# Supplementary material
Source: Springer Nature journal article supplement (https://www.springermedizin.de/resource/supplementary/13012_2010_306_MOESM4_ESM.pdf/9629682)

**GMFCS: Familiarity -- East**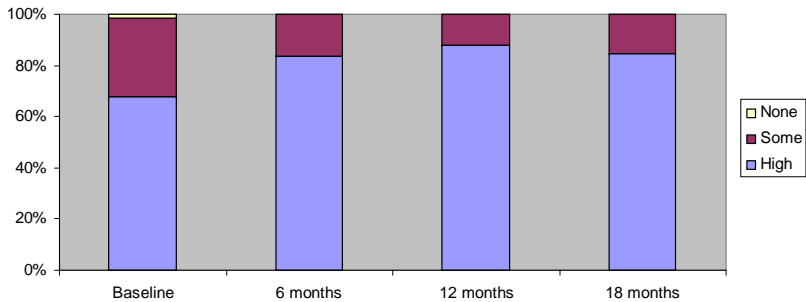**GMFCS: Use -- East**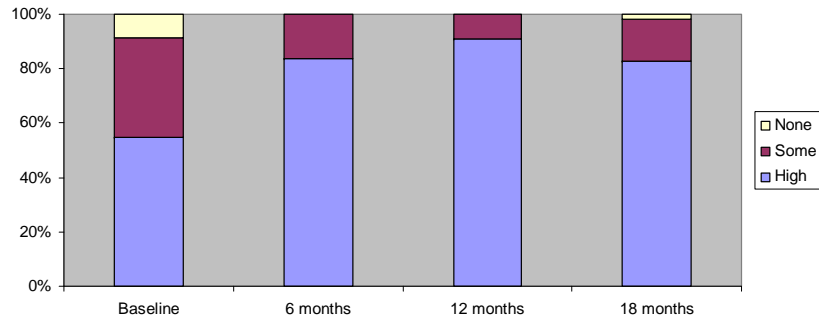**GMFCS: Familiarity -- West**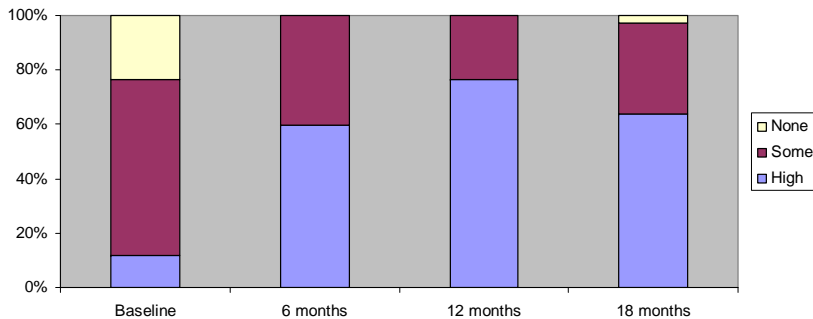**GMFCS: Use -- West**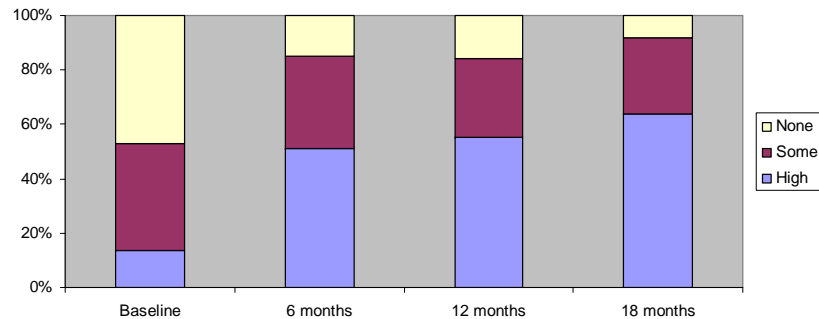

Supplement: MOESM4 [file 9629682]
